# Supplementary material for: Specialized Bacteroidetes dominate the Arctic Ocean during marine spring blooms
Source: Frontiers journal article supplement (doi:10.3389/fmicb.2024.1481702), 2024-11-05

**Supplementary figure 1.** Glycosyl hydrolase (GH) profiles of different taxa, showing the percentage that each family represents out of the total copy number. GH families whose abundance was under the 60% quartile were grouped under the "Minor" tag to ease visualization.

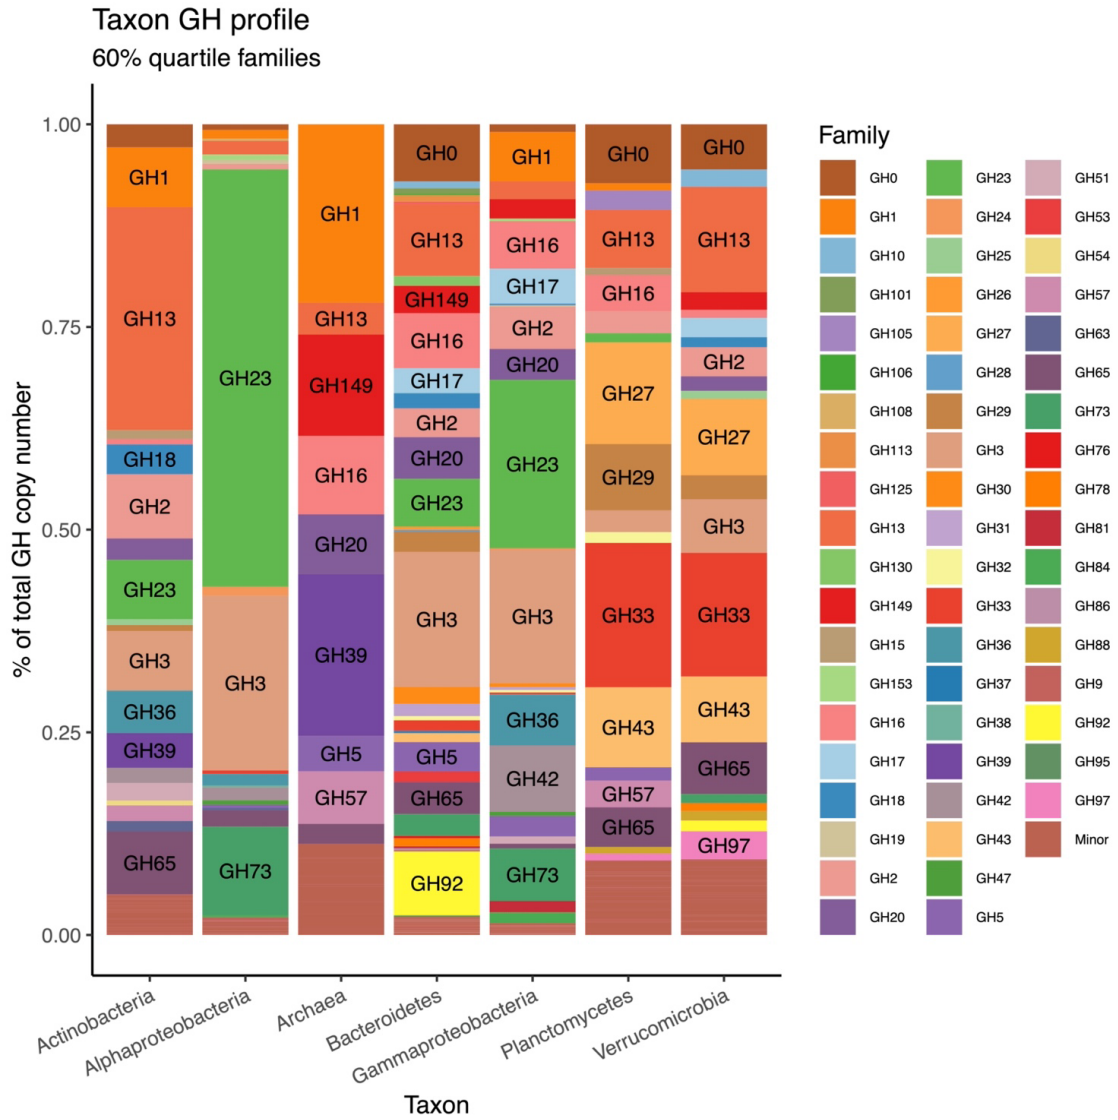

Supplement: Image_1.pdf [file Image_1.pdf]
