# Supplementary material for: Specialized Bacteroidetes dominate the Arctic Ocean during marine spring blooms
Source: Frontiers journal article supplement (doi:10.3389/fmicb.2024.1481702), 2024-11-05

**Supplementary figure 2.** Glycosyl transferase (GT) profiles of different taxa, showing the percentage that each family represents out of the total copy number.

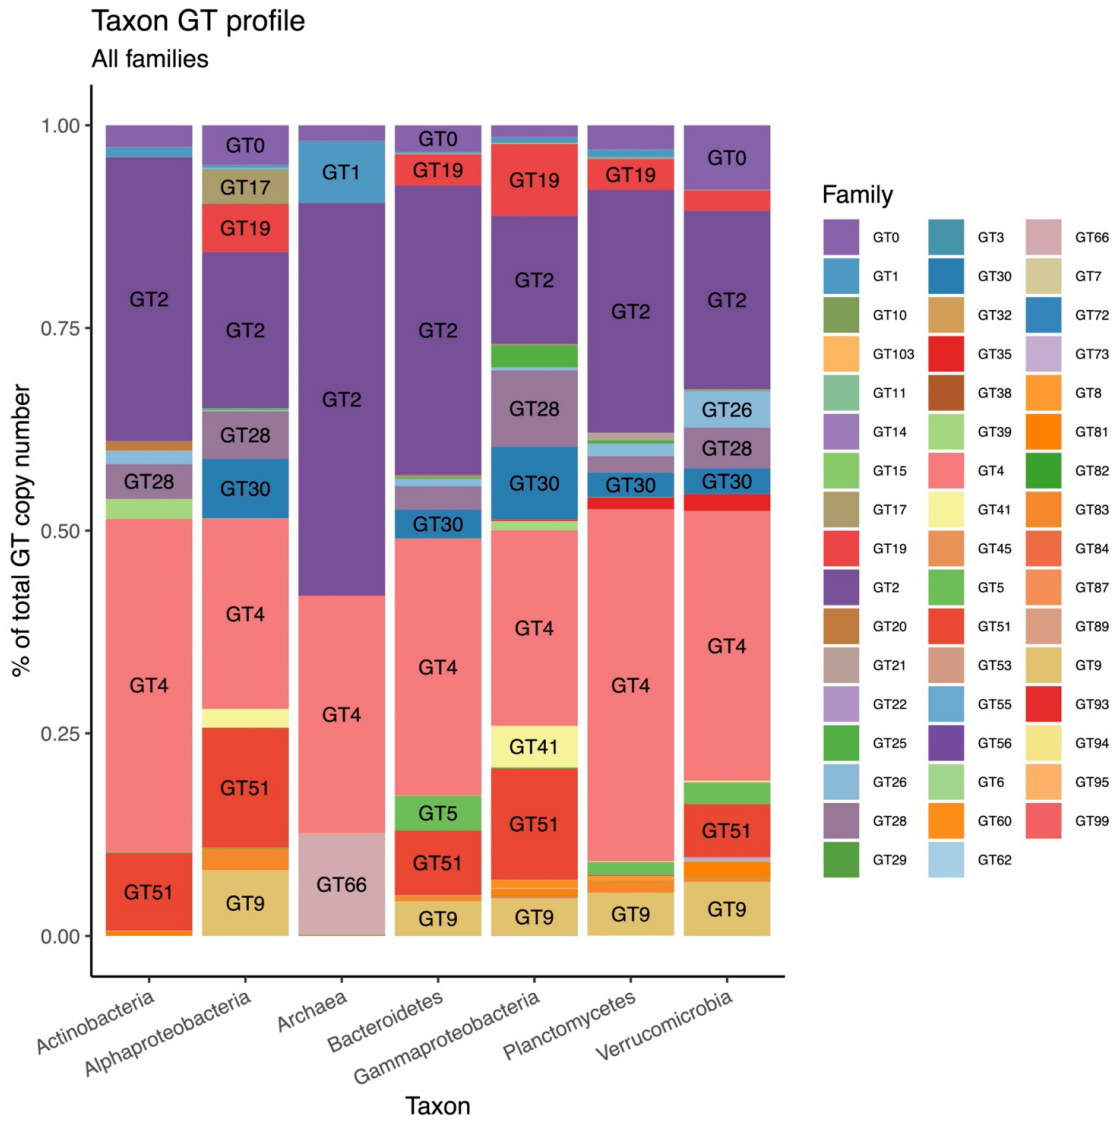

Supplement: Image_2.pdf [file Image_2.pdf]
