# Supplementary material for: Specialized Bacteroidetes dominate the Arctic Ocean during marine spring blooms
Source: Frontiers journal article supplement (doi:10.3389/fmicb.2024.1481702), 2024-11-05

**Supplementary figure 3.** Polysaccharide lyase (PL) profiles of different taxa, showing the percentage that each family represents out of the total copy number.

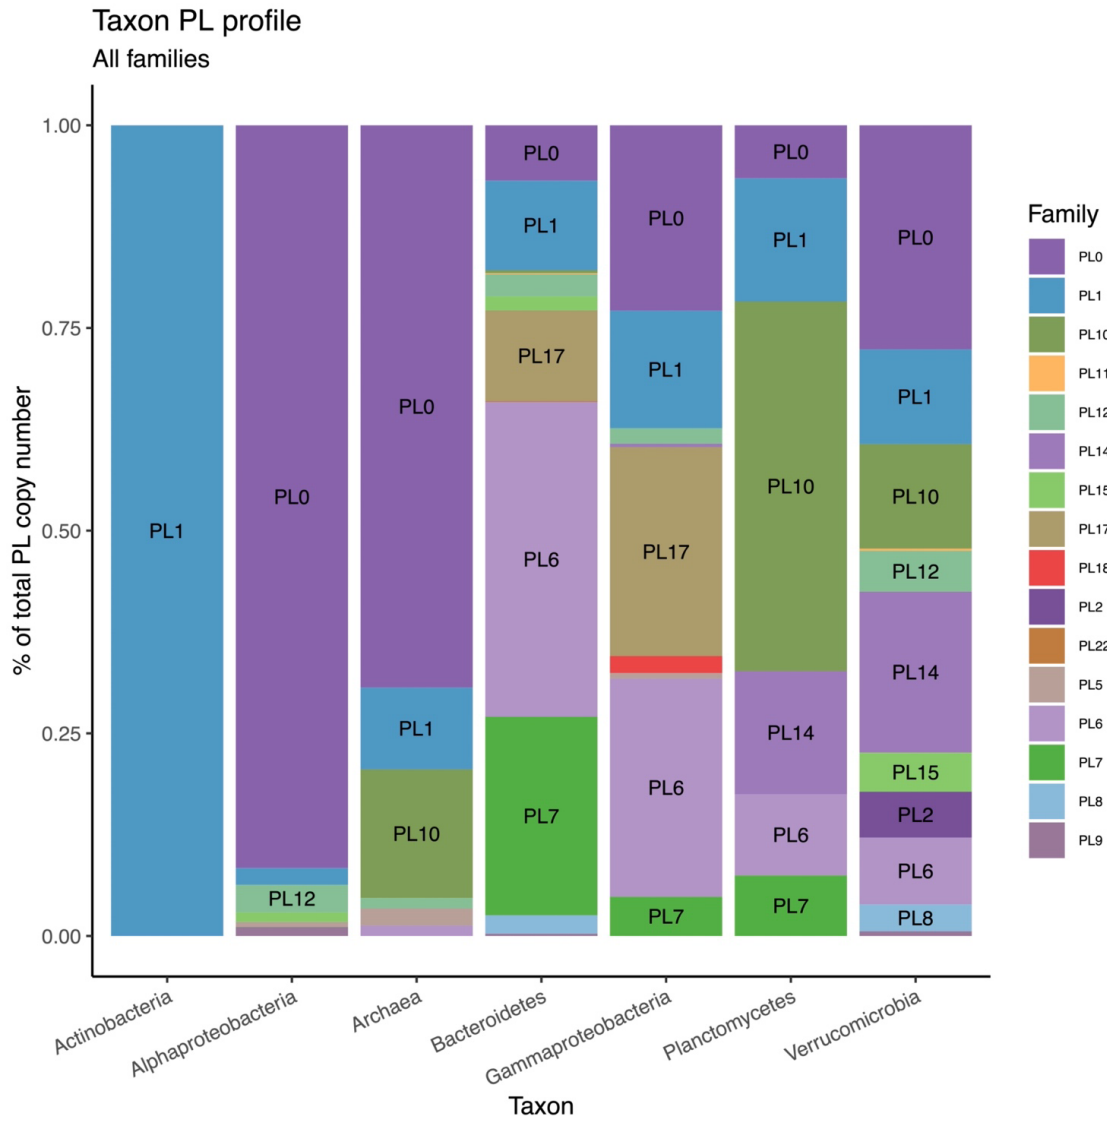

Supplement: Image_3.pdf [file Image_3.pdf]
